# Supplementary material
Source: PubMed Central journal article supplement (PMC1965534)
Supplement: pnas_0700267104_4.pdf [file pnas_0700267104_4.pdf]

## SI Text

**SI Results.** The signals obtained by the developed device by flowing glutathione-labeled Alexa532 at the single-molecule level can be assigned to fluorescence from single fluorophores (Fig. 2). However, there is a possibility that the signals might be caused by a light scattering of impurity particles. To eliminate the latter possibility and to demonstrate that the observed signals were fluorescence, the laser power dependence of the observed signals was investigated. The obtained results could be analyzed consistently by assuming a photocycle of the fluorophore involving the ground state ( $S_0$ ), the excited singlet state ( $S_1$ ), and the excited triplet state ( $T_1$ ). The results therefore demonstrate that the signals are fluorescence from single molecules. Furthermore, the data show that the appearance of  $T_1$  in the photocycle is partly responsible for the fluorescence intensity fluctuation of G-Alexa.

We investigated the dependency of the signal intensity obtained by flowing G-Alexa at the single molecule level on the power of excitation laser. If the signals originate from the impurity particles, the scattered light should be linearly dependent on the excitation laser power. In contrast, if the signals are fluorescence, the intensity should saturate at the higher excitation laser power due to the changes in the rate-limiting step in the photocycle. Under the assumption that the three states,  $S_0$ ,  $S_1$  and  $T_1$ , are involved in the photocycle of the fluorophore, the measurable fluorescence intensity,  $I_f$ , at constant excitation can be described by Eq. 1:

$$I_f \propto \frac{k_S k_T \sigma_{\text{dye}} I_{\text{ex}}}{(k_S + k_{\text{isc}}) k_T + (k_T + k_{\text{isc}}) \sigma_{\text{dye}} I_{\text{ex}}} \quad [1]$$

where  $I_{\text{ex}}$  is the photon flux of the excitation laser,  $\sigma_{\text{dye}}$  is the molecular absorption cross section of the dye and is  $3.1 \times 10^{-16} \text{ cm}^2$  for Alexa532 at 532 nm,  $k_S$  is the rate constant for the sum of radiative and nonradiative transitions from  $S_1$  to  $S_0$ ,  $k_T$  is the rate constant of triplet state depletion, and  $k_{\text{isc}}$  is the rate constant of intersystem crossing from  $S_1$  to  $T_1$  (1). At the limit of weak laser power,  $I_f$  is proportional to  $I_{\text{ex}}$ , because the second term of the

denominator is negligible. In this condition, the rate-limiting step is the excitation step from  $S_0$  to  $S_1$ . In contrast, at the limit of strong laser power,  $I_f$  becomes constant because the first term of the denominator is negligible. This corresponds to the changes in the rate limiting step in the photocycle. If  $k_{isc} > k_T$ , the decay of  $T_1$  is rate-limiting. If  $k_{isc} < k_T$ , the decay of  $S_1$  becomes rate-limiting. In either case, the saturation of the observed signals demonstrates that the signals are fluorescence.

The laser power dependence of the signals obtained by flowing G-Alexa at the single molecule level is shown in SI Fig. 6. The background intensity increased monotonically upon the increase of laser power, because the background is caused mainly by Raman scattering of water (1, 2). In contrast, the observed signal intensity saturated at  $\approx 200$  mW (corresponding photon flux is  $\approx 0.4 \times 10^{27} \text{ m}^{-2} \cdot \text{s}^{-1}$ ), suggesting that the rate-limiting step in the photocycle changes from the excitation step of  $S_0$  to the decay step of either  $S_1$  or  $T_1$  (3). The saturation was analyzed by Eq. 1. We assumed that  $k_{isc}$  is  $1.1 \times 10^6 \text{ s}^{-1}$ , which is the literature value for Rhodamin 6G (4). The fitting of the data by Eq. 1 gives a  $k_T$  value of  $3 \times 10^4 \text{ s}^{-1}$  and a  $k_S$  value of  $2 \times 10^8 \text{ s}^{-1}$ , respectively. Despite the uncertainty of the excitation photon flux, the estimated  $k_S$  value of  $2 \times 10^8 \text{ s}^{-1}$ , corresponding to a fluorescence lifetime of  $\approx 5$  ns, is reasonable for organic fluorophores. Although no value in the literature was reported for  $k_T$  of Alexa532 at room temperature, the value for Rhodamin 6G was  $1.10 \times 10^6 \text{ s}^{-1}$  (4). Considering the uncertainty of excitation photon flux and other parameters, the two values should be considered comparable, and they support the analysis based on the three-state model. The results demonstrate that the observed signals are not caused by a scattering of small particles but by fluorescence from Alexa532. Because  $k_{isc} > k_T$ , the analyzed data further suggest that the decay of  $T_1$  likely limits the rate of the photocycle.

To confirm that the decay of  $T_1$  limits the rate of the photocycle of Alexa532, the effect of a triplet state quencher on the fluorescence intensity was investigated. We used 6-hydroxy-2,5,7,8-tetramethylchroman-2-carboxylic acid (Trolox), which was reported to quench the triplet state of Cy5 (5). To make the experiment easy, the fluorescence intensity was observed at the bulk condition by flowing the samples at relatively high concentration (83.4 pM) to the same flow cell. The laser excitation and fluorescence detection systems

were the same as those used for the single-molecule measurements. The laser power dependence of bulk fluorescence intensity was measured for G-Alexa in the presence of 4 M Gdm with and without 2 mM Trolox (SI Fig. 7). The same experiment was also conducted for cyt *c*-Alexa in the presence of 1 M Gdm (SI Fig. 7). Firstly, the data for G-Alexa without Trolox (filled circles) showed the saturation, and were consistent with that obtained at the single molecule level (SI Fig. 6). A similar saturation was also observed for cyt *c*-Alexa (triangles). In contrast, the corresponding data for G-Alexa obtained in the presence of Trolox (open circles) do not show the saturation until the excitation laser power of 1 W (photon flux of  $\approx 0.6 \times 10^{27} \text{ m}^{-2} \cdot \text{s}^{-1}$ ). The lines in SI Fig. 7 were obtained by the fitting of the data to Eq. 1. The  $k_{\text{isc}}$  and  $k_{\text{S}}$  values were fixed to  $1.1 \times 10^6 \text{ s}^{-1}$  and  $2 \times 10^8 \text{ s}^{-1}$ , respectively. The fitting gave  $k_{\text{T}}$  of  $>10^9 \text{ s}^{-1}$  for G-Alexa in the presence of Trolox. In contrast, the fitting of the data for G-Alexa in the absence of Trolox, conducted by omitting a point at 1.5 W excitation, gave  $k_{\text{T}}$  of  $1.2 \times 10^5 \text{ s}^{-1}$ . The significant acceleration of  $k_{\text{T}}$  in the presence of Trolox supported the pronounced quenching effect of  $\text{T}_1$  by Trolox. We stress again that the  $k_{\text{T}}$  values should be considered as rough estimates mainly due to the uncertainty of the photon flux. However, the results clearly demonstrate that the relatively slow decay of  $\text{T}_1$  is responsible for the saturation behavior observed for G-Alexa in the absence of Trolox. Interestingly, cyt *c*-Alexa also showed a saturation curve, whose fitting by assuming  $k_{\text{isc}} = 1.1 \times 10^6 \text{ s}^{-1}$  and  $k_{\text{S}} = 4 \times 10^8 \text{ s}^{-1}$  gave  $k_{\text{T}}$  of  $6.7 \times 10^5 \text{ s}^{-1}$ . A larger  $k_{\text{S}}$  value compared to that of G-Alexa was used in the fitting, because  $\text{S}_1$  is partly quenched by heme in cyt *c*-Alexa. The obtained  $k_{\text{T}}$  value demonstrates that heme in cyt *c*-Alexa cannot quench  $\text{T}_1$  of Alexa efficiently.

We next investigated the effect of the triple state quencher on the fluorescence intensity fluctuation of G-Alexa. As reproduced in SI Fig. 8, the autocorrelation function of the single-molecule traces of G-Alexa observed in the absence of Trolox (filled circles) possessed a slow decay with a time constant of  $\approx 75$  ms. The corresponding single molecule traces of G-Alexa were obtained in the presence of 2 mM Trolox at the same excitation laser power (600 mW). The autocorrelation function for the data in the presence of Trolox (open circles) was systematically smaller than that obtained in the absence of Trolox, and the fitting of the data by a single exponential gave a time constant of  $\sim 11$  ms. The results

demonstrate that the slow component of the autocorrelation function of G-Alexa in the absence of Trolox was partly caused by intensity fluctuations related to the appearance of  $T_1$  in the photocycle.

Finally, we discuss that the effect of Trolox on the fluorescence intensity fluctuation of G-Alexa is distinct from that of heme in cyt *c*-Alexa. While the autocorrelation functions for G-Alexa in the presence of Trolox (SI Fig. 8) and for cyt *c*-Alexa (Fig. 5) show similar correlation times of  $\approx 11$  ms and  $\approx 15$  ms, respectively, they should be interpreted differently. In the case of G-Alexa in the presence Trolox,  $T_1$  is selectively quenched as demonstrated in a significant increase in  $k_T$  ( $>10^9$  s $^{-1}$ ) compared to that in the absence of Trolox ( $1.2 \times 10^5$  s $^{-1}$ ). In the case of cyt *c*-Alexa, the heme group primarily quenches  $S_1$  of Alexa as demonstrated in the weakened fluorescence intensity. In contrast, the heme group does not quench  $T_1$  of Alexa effectively as suggested in  $k_T$  ( $6.7 \times 10^5$  s $^{-1}$ ) that was similar to that of G-Alexa in the absence of Trolox. A further investigation is necessary for the detailed analysis of the autocorrelation functions; however, we suggest that the correlation function of cyt *c*-Alexa mainly reflects the quenching of  $S_1$  by heme, and the dynamic changes in the Alexa-heme distance.

**SI Materials and Methods. Bulk fluorescence measurements.** The fluorescence intensities in the bulk conditions were observed by using the developed apparatus. The G-Alexa samples contained 83.4 pM G-Alexa, 20 mM Hepes at pH 7.5, 40 mM sodium chloride and 4 M Gdm with and without 2 mM Trolox (Calbiochem, Darmstadt, Germany). The cyt *c*-Alexa sample contained 83.4 pM cyt *c*-Alexa, 20 mM Hepes at pH 7.5, 40 mM sodium chloride and 1 M Gdm. All samples were degassed based on the procedure described in the main text. The laser power was monitored and adjusted by a laser power meter (Model 407A; Spectra Physics, Mountain View, CA). The time-dependent changes of the fluorescence images of the cell were detected on the EMCCD with a setting of the EM gain at 150. After the irradiation of laser, the images with an exposure time of 103 ms were consecutively recorded for  $\approx 10$  s. The average intensity of the flow pass at each time point was estimated. The fluorescence intensity at the moment immediately after the laser

excitation was obtained by the extrapolation of the average intensity to time 0 to minimize the effect of photobleaching.

***Single-molecule fluorescence measurements.*** The fluorescence traces of G-Alexa in the presence of Trolox at the single molecule level were observed based on the method described in the main text. G-Alexa was prepared at a concentration of 48.2 fM in 20 mM Hepes at pH 7.5, 0.001% polyoxyethylene sorbitan monolaurate, 40 mM sodium chloride and 2 mM Trolox.

1. Zander C, Enderlein J, Keller RA eds (2002) *Single Molecule Detection in Solution* (Wiley–VCH, Berlin).
2. Moerner WE, Orrit M (1999) *Science* 283:1670-1676.
3. Weber MA, Stracke F, Meixner AJ (1999) *Cytometry* 36:217-223.
4. Widengren J, Mets, Ü., & Rigler R (1995) *J Phys Chem* 99:13368-13379.
5. Rasnik I, McKinney SA, Ha T (2006) *Nat Methods* 3:891-893.
